# Supplementary figures and images for: Structures of MERS-CoV spike glycoprotein in complex with sialoside attachment receptors
Source: Springer Nature journal article supplement (doi:10.1038/s41594-019-0334-7), 2019-12-01

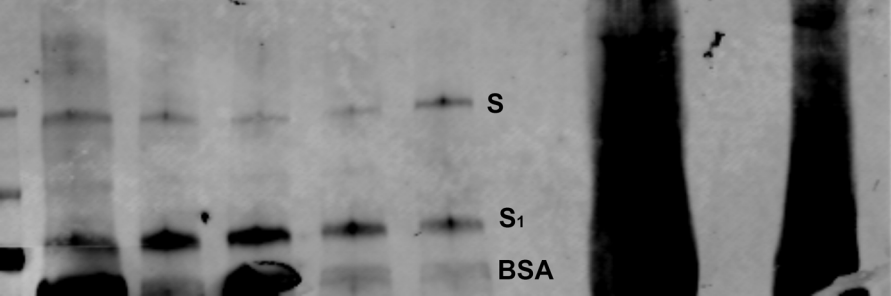

Supplement: 41594_2019_334_MOESM2_ESM.pdf [file 41594_2019_334_MOESM2_ESM.pdf]
